# Supplementary figures and images for: Autophagic cell death is dependent on lysosomal membrane permeability through Bax and Bak
Source: eLife journal article supplement (doi:10.7554/elife.30543), 2017-11-17

Figure 1—figure supplement 1

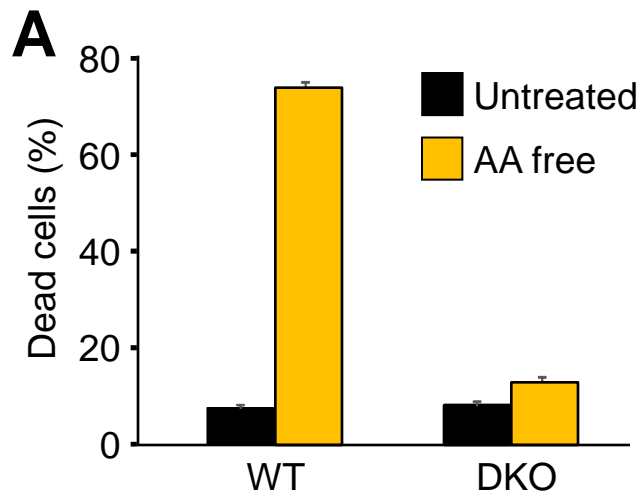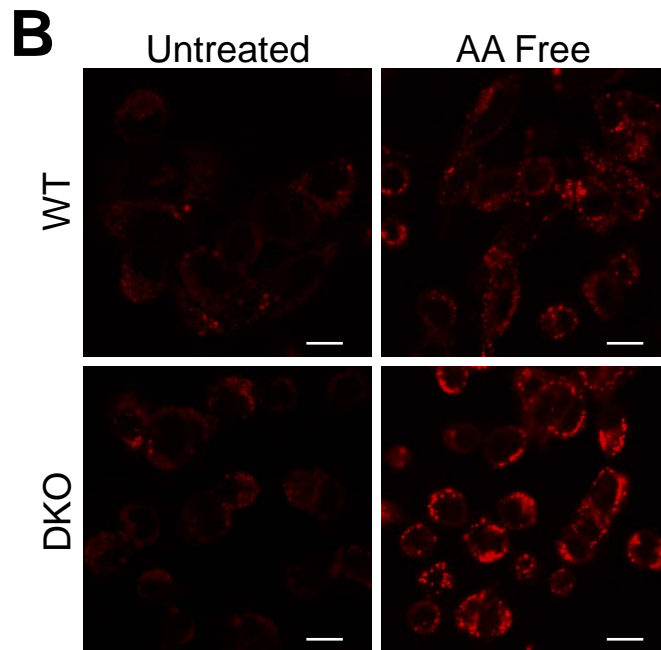

Supplement: supp [file elife_poa_e30543_Figure_1_figure_supplement1.pdf › elife_poa_e30543_Figure_1_figure_supplement1.pdf]

Figure 2—figure supplement 1

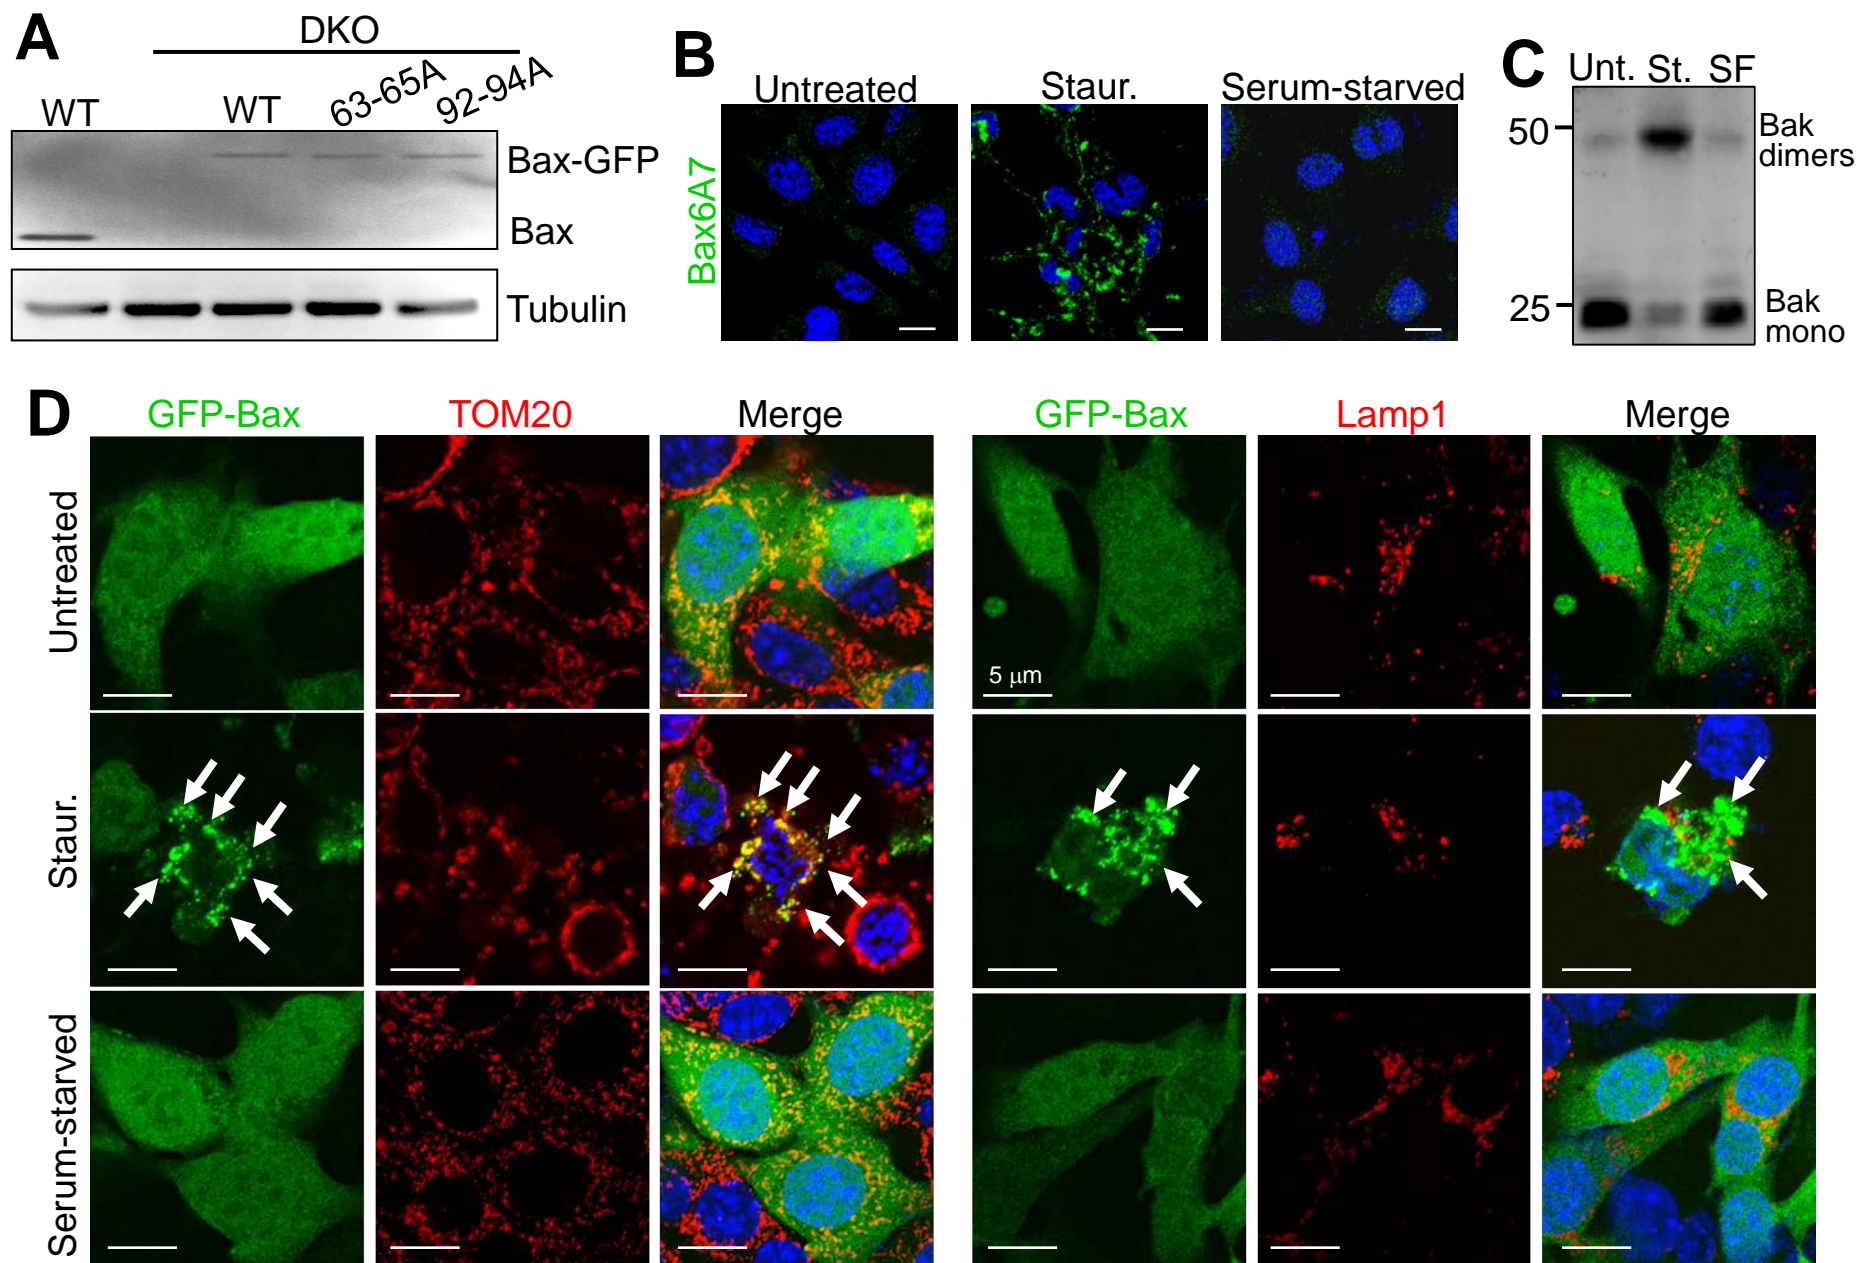

Supplement: supp [file elife_poa_e30543_Figure_2_figure_supplement1.pdf › elife_poa_e30543_Figure_2_figure_supplement1.pdf]
